# Supplementary material for: Genetic Polymorphisms in XRCC1, CD3EAP, PPP1R13L, XPB, XPC, and XPF and the Risk of Chronic Benzene Poisoning in a Chinese Occupational Population
Source: PubMed Central journal article supplement (PMC4683048; doi:10.1371/journal.pone.0144458), 2015-12-17

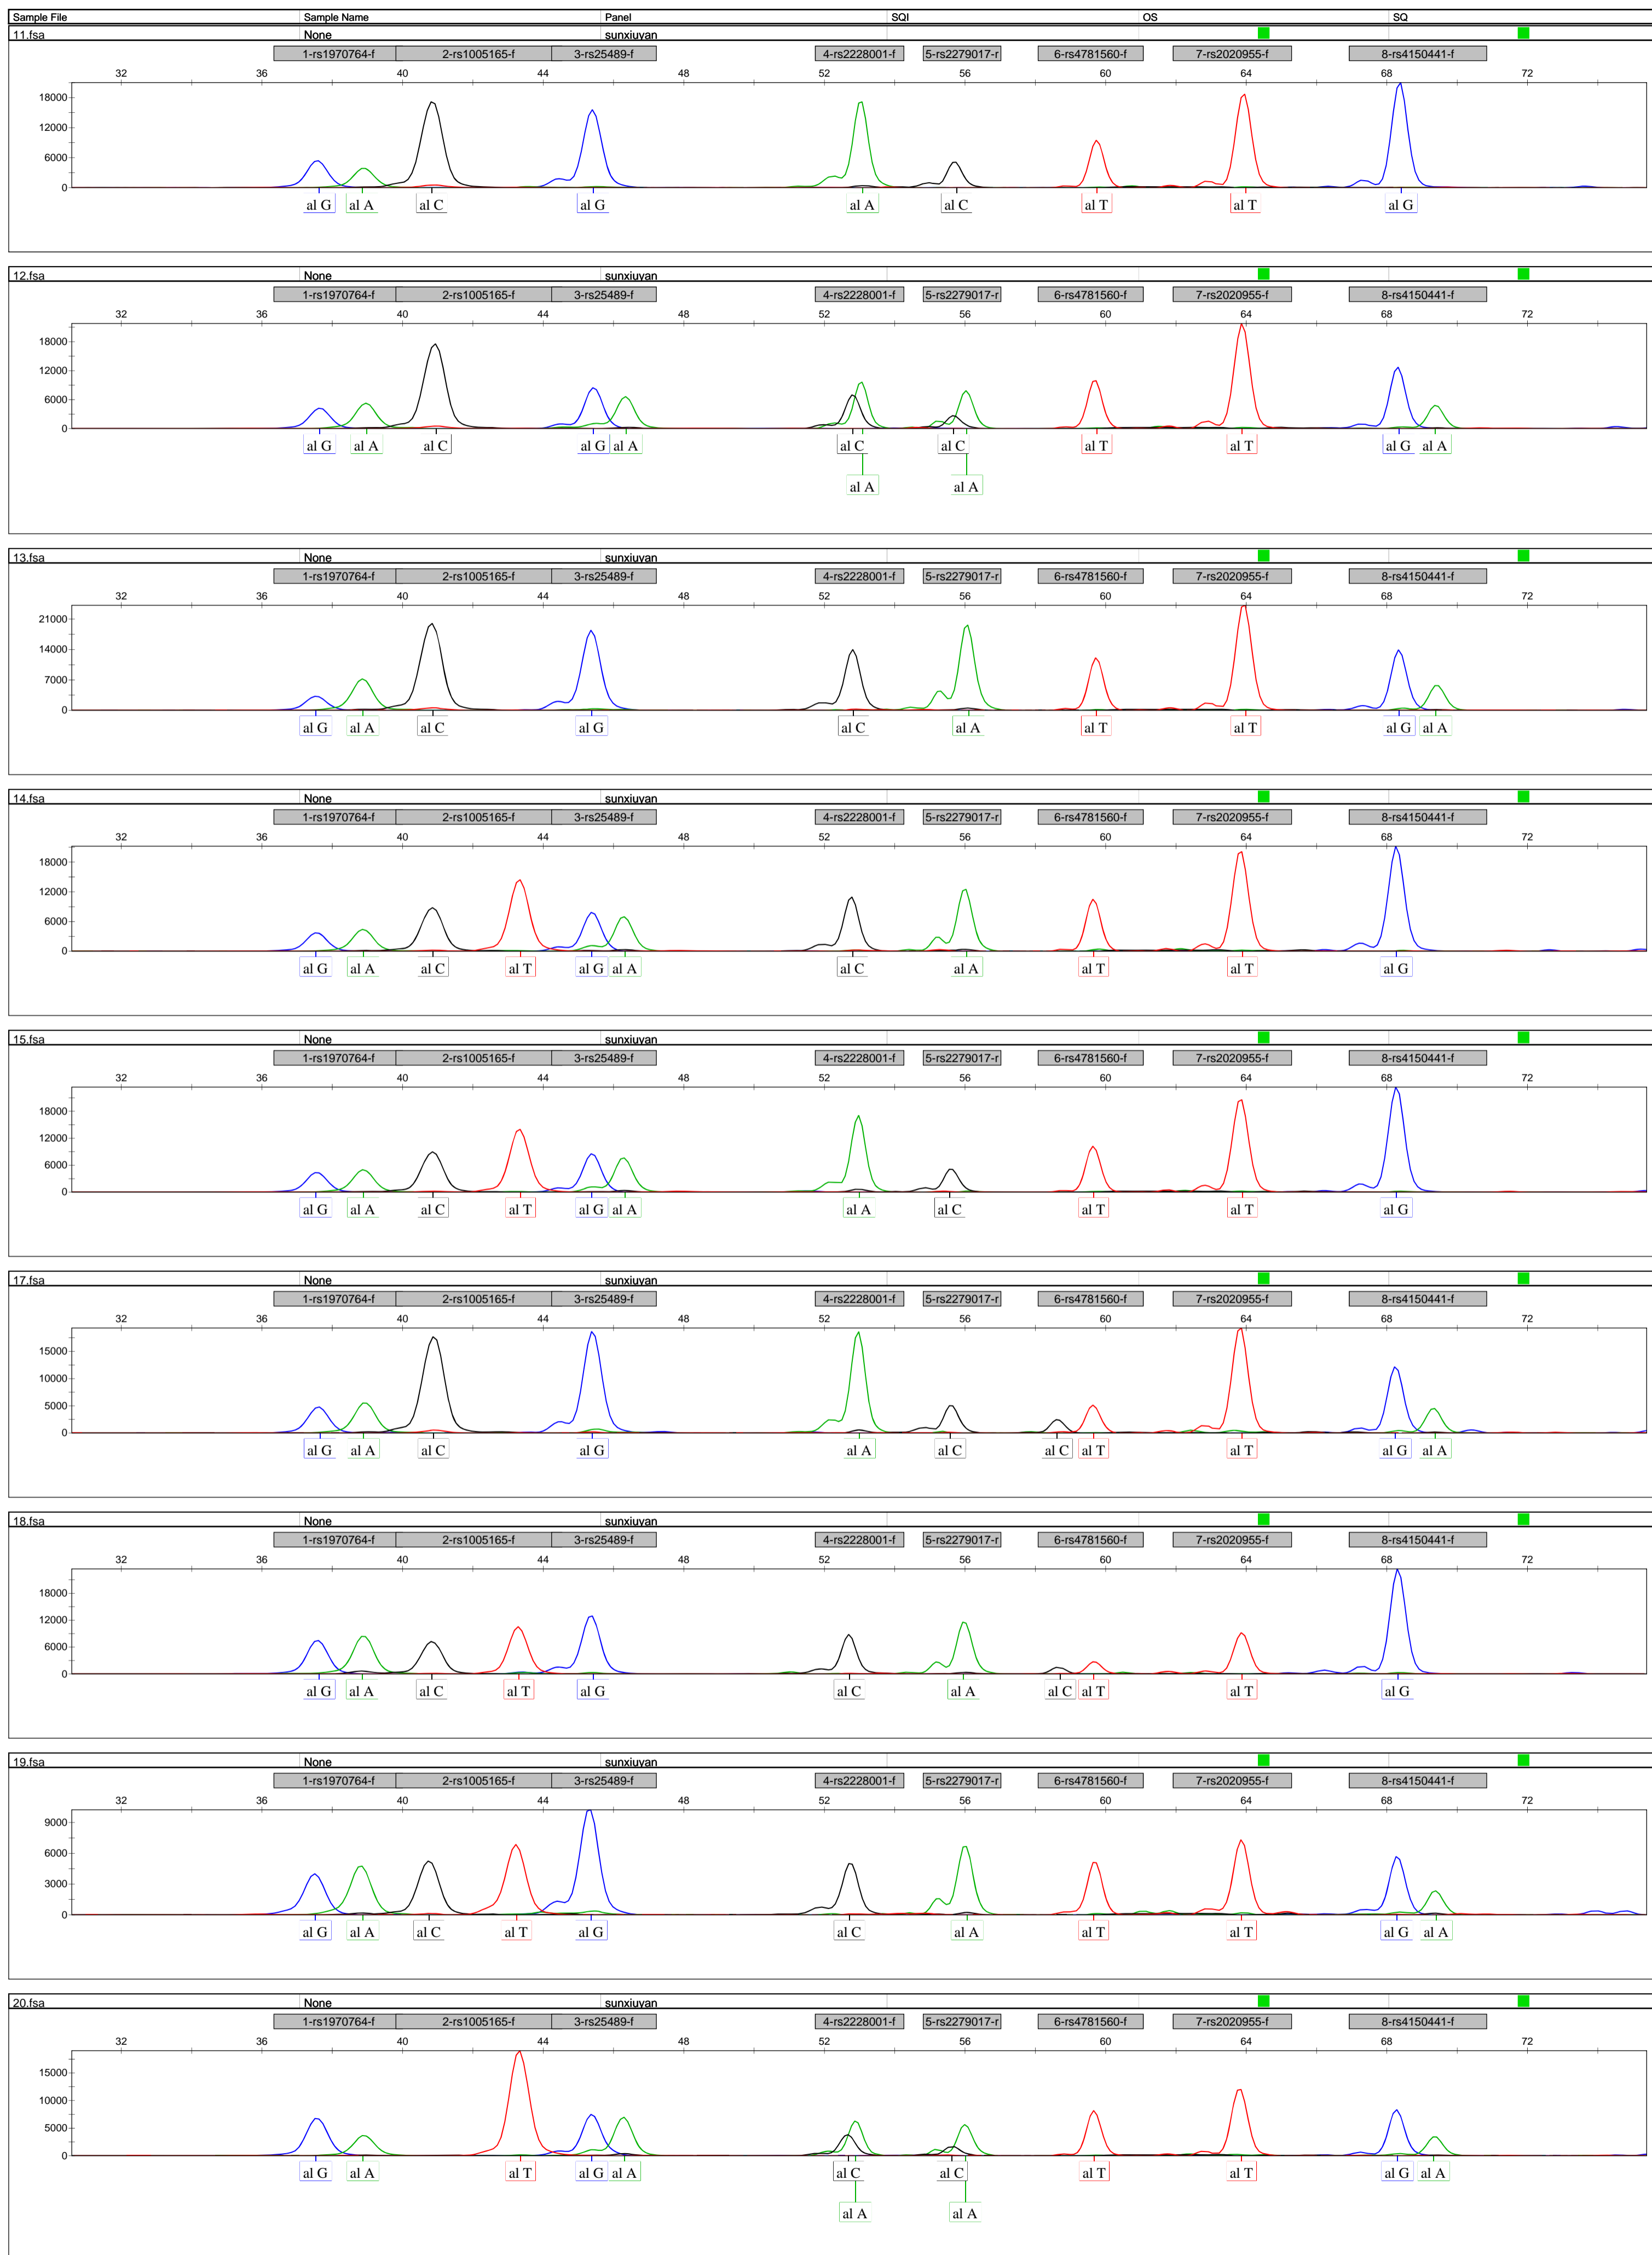

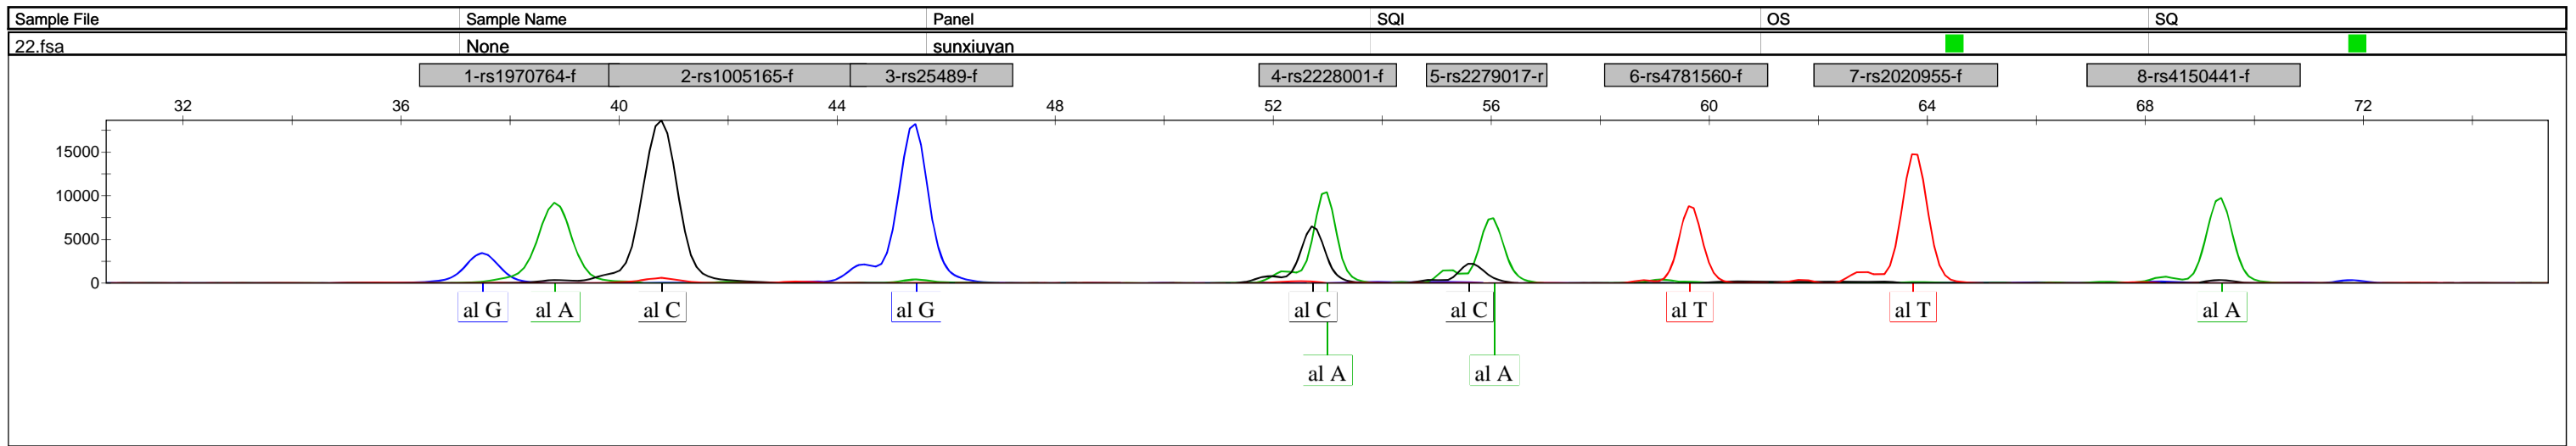

Supplement: pone.0144458.s001.pdf [file pone.0144458.s001.pdf]
